# Supplementary material for: Innovative methods for dissemination of research results during a Pandemic: A Game- Changing Approach in the ORCHESTRA project
Source: Research Square preprint supplement (doi:10.21203/rs.3.rs-5615137/v1), 2025-02-14
Supplement: Supplementary file 1 [file f3e4071d6684e6fde5140991.xlsx]

## Sheet: Tabelle1
Round 1
		Authors	Year		Relevance to Experts	SD	SE	t-crit	CI		Clinical Relevance	SD	SE	t-crit	CI		Relevance to the General Public	SD	SE	t-crit	CI		Relevance to Policy Makers	SD	SE	t-crit	CI
		Tacconelli et al.	2022		4	0	0	4.30265	0		2.66667	1.52753	0.881917	4.30265	3.79458		2.66667	0.57735	0.333333	4.30265	1.43422		4	0	0	4.30265	0
		Porru et al.	2022		3.33333	0.57735	0.333333	4.30265	1.43422		3.33333	0.57735	0.333333	4.30265	1.43422		2.66667	0	0	4.30265	0		3.66667	0.57735	0.333333	4.30265	1.43422
		Giannella et al.	2022		3.33333	0.57735	0.333333	4.30265	1.43422		3.33333	0.57735	0.333333	4.30265	1.43422		1.66667	0	0	4.30265	0		2.66667	0.57735	0.333333	4.30265	1.43422
		Di Chiara et al.	2022		3.33333	0.57735	0.333333	4.30265	1.43422		3	1	0.57735	4.30265	2.48414		3	0.57735	0.333333	4.30265	1.43422		3	0.57735	0.333333	4.30265	1.43422
		Contento et al.	2023		3.33333	1.1547	0.666667	4.30265	2.86844		3	0.57735	0.333333	4.30265	1.43422		1.66667	1.1547	0.666667	4.30265	2.86844		2.66667	1	0.57735	4.30265	2.48414
		Le Gleut et al.	2023		3.33333	1.1547	0.666667	4.30265	2.86844		2.66667	0.57735	0.333333	4.30265	1.43422		2.33333	0.57735	0.333333	4.30265	1.43422		3	1.73205	1	4.30265	4.30265
		Reyna-Villasmil et al.	2022		3.33333	0.57735	0.333333	4.30265	1.43422		2.33333	1	0.57735	4.30265	2.48414		2	0.57735	0.333333	4.30265	1.43422		2.33333	0.57735	0.333333	4.30265	1.43422
		Righi et al.	2022		3	0	0	4.30265	0		3.66667	0.57735	0.333333	4.30265	1.43422		3	0.57735	0.333333	4.30265	1.43422		2.66667	0.57735	0.333333	4.30265	1.43422
		Gupta et al.	2023		3	0	0	4.30265	0		3.33333	0	0	4.30265	0		2	1	0.57735	4.30265	2.48414		2.66667	0	0	4.30265	0
		Konnova et al.	2022		3	0	0	4.30265	0		3.33333	0.57735	0.333333	4.30265	1.43422		1.66667	0.57735	0.333333	4.30265	1.43422		2.66667	0.57735	0.333333	4.30265	1.43422
		Novelli et al.	2023		3	1	0.57735	4.30265	2.48414		3	0.57735	0.333333	4.30265	1.43422		2.33333	0.57735	0.333333	4.30265	1.43422		2.66667	1	0.57735	4.30265	2.48414
		Savoldi et al.	2022		3	0	0	4.30265	0		3	0.57735	0.333333	4.30265	1.43422		2.33333	1	0.57735	4.30265	2.48414		2.33333	1.1547	0.666667	4.30265	2.86844
		Collatuzzo et al.	2022		2.66667	0.57735	0.333333	4.30265	1.43422		3.33333	0.57735	0.333333	4.30265	1.43422		3	0.57735	0.333333	4.30265	1.43422		3.33333	0.57735	0.333333	4.30265	1.43422
		Collatuzzo et al.	2023		2.66667	0.57735	0.333333	4.30265	1.43422		3.33333	0.57735	0.333333	4.30265	1.43422		2.66667	1	0.57735	4.30265	2.48414		3	0.57735	0.333333	4.30265	1.43422
		Bonazzetti et al.	2023		2.66667	0.57735	0.333333	4.30265	1.43422		3.33333	0.57735	0.333333	4.30265	1.43422		1.66667	0.57735	0.333333	4.30265	1.43422		2.66667	0.57735	0.333333	4.30265	1.43422
		Giannella et al.	2023		2.33333	0.57735	0.333333	4.30265	1.43422		3	0.57735	0.333333	4.30265	1.43422		1.33333	0.57735	0.333333	4.30265	1.43422		1.66667	1.1547	0.666667	4.30265	2.86844
		Dellacasa et al.	2023		2.33333	1.52753	0.881917	4.30265	3.79458		2.66667	0.57735	0.333333	4.30265	1.43422		1.66667	0.57735	0.333333	4.30265	1.43422		3	0.57735	0.333333	4.30265	1.43422
		Rinaldi et al.	2022		2.33333	0.57735	0.333333	4.30265	1.43422		2.66667	0.57735	0.333333	4.30265	1.43422		1.66667	0.57735	0.333333	4.30265	1.43422		3.33333	0	0	4.30265	0
		Novelli et al.	2023		2.33333	0.57735	0.333333	4.30265	1.43422		2.33333	0	0	4.30265	0		2.66667	0.57735	0.333333	4.30265	1.43422		3	1.1547	0.666667	4.30265	2.86844
		Matuozzo et al.	2023		2.33333	0.57735	0.333333	4.30265	1.43422		2.33333	0.57735	0.333333	4.30265	1.43422		1.66667	0	0	4.30265	0		1.66667	1	0.57735	4.30265	2.48414
		Huth et al.	2022		2	1	0.57735	4.30265	2.48414		1.66667	1	0.57735	4.30265	2.48414		1	0.57735	0.333333	4.30265	1.43422		2	1.1547	0.666667	4.30265	2.86844
Round 2
		Authors	Year		Relevance to Experts	SD	SE	t-crit	CI		Clinical Relevance	SD	SE	t-crit	CI		Relevance to the General Public	SD	SE	t-crit	CI		Relevance to Policy Makers	SD	SE	t-crit	CI
		Gentilotti et al.	2023		2.66667	1.52753	0.881917	4.30265	3.79458		3.33333	0.57735	0.333333	4.30265	1.43422		3	0	0	4.30265	0		2.66667	0.57735	0.333333	4.30265	1.43422
		Appel et al.	2024		3	1	0.57735	4.30265	2.48414		2.66667	1.52753	0.881917	4.30265	3.79458		2.33333	1.52753	0.881917	4.30265	3.79458		2.66667	1.52753	0.881917	4.30265	3.79458
		Novelli et al.	2023		2	1	0.57735	4.30265	2.48414		1.66667	0.57735	0.333333	4.30265	1.43422		1.66667	0.57735	0.333333	4.30265	1.43422		3	1.73205	1	4.30265	4.30265
		Le Gleut et al.	2023		2.66667	1.1547	0.666667	4.30265	2.86844		2.66667	0.57735	0.333333	4.30265	1.43422		2.66667	0.57735	0.333333	4.30265	1.43422		3.33333	0.57735	0.333333	4.30265	1.43422
		Tsurkalenko et al.	2024		2.33333	0.57735	0.333333	4.30265	1.43422		2	0	0	4.30265	0		3.33333	0.57735	0.333333	4.30265	1.43422		2.66667	0.57735	0.333333	4.30265	1.43422
		Rinaldi et al.	2022		2.66667	0.57735	0.333333	4.30265	1.43422		2	1	0.57735	4.30265	2.48414		3.33333	1.1547	0.666667	4.30265	2.86844		4	0	0	4.30265	0
		Gatti et al.	2022		3	0	0	4.30265	0		3	1	0.57735	4.30265	2.48414		2.33333	0.57735	0.333333	4.30265	1.43422		2.66667	0.57735	0.333333	4.30265	1.43422
		Leomanni et al.	2023		3.33333	0.57735	0.333333	4.30265	1.43422		2.66667	0.57735	0.333333	4.30265	1.43422		2.66667	0.57735	0.333333	4.30265	1.43422		3	1	0.57735	4.30265	2.48414
		Porru et al.	2023		3	0	0	4.30265	0		3.33333	0.57735	0.333333	4.30265	1.43422		3.33333	1.1547	0.666667	4.30265	2.86844		3.66667	0.57735	0.333333	4.30265	1.43422
		Spiteri et al.	2024		3	1	0.57735	4.30265	2.48414		3	1	0.57735	4.30265	2.48414		2	1	0.57735	4.30265	2.48414		2.33333	1.1547	0.666667	4.30265	2.86844
		Matuozzo et al.	2023		2.66667	1.52753	0.881917	4.30265	3.79458		2.33333	0.57735	0.333333	4.30265	1.43422		2	0	0	4.30265	0		2.66667	0.57735	0.333333	4.30265	1.43422
		Gupta et al.	2023		3.33333	0.57735	0.333333	4.30265	1.43422		3.66667	0.57735	0.333333	4.30265	1.43422		2.33333	0.57735	0.333333	4.30265	1.43422		2.33333	0.57735	0.333333	4.30265	1.43422
		Chenane et al.	2023		2.66667	0.57735	0.333333	4.30265	1.43422		3.66667	0.57735	0.333333	4.30265	1.43422		2.66667	0.57735	0.333333	4.30265	1.43422		2.33333	0.57735	0.333333	4.30265	1.43422
		Dellacasa et al.	2024		2.66667	1.52753	0.881917	4.30265	3.79458		2.66667	0.57735	0.333333	4.30265	1.43422		2	0	0	4.30265	0		3.33333	0.57735	0.333333	4.30265	1.43422
		Attieh et al.	2023		2.66667	1.52753	0.881917	4.30265	3.79458		2.66667	0.57735	0.333333	4.30265	1.43422		2	0	0	4.30265	0		3	1	0.57735	4.30265	2.48414
		Rinaldi et al.	2024		2	1.73205	1	4.30265	4.30265		1.66667	1.1547	0.666667	4.30265	2.86844		1.66667	0.57735	0.333333	4.30265	1.43422		2.33333	1.52753	0.881917	4.30265	3.79458
		Contento et al.	2023		3	1	0.57735	4.30265	2.48414		2	1	0.57735	4.30265	2.48414		2	1	0.57735	4.30265	2.48414		2.33333	1.52753	0.881917	4.30265	3.79458
		Merkt et al.	2024		3	1	0.57735	4.30265	2.48414		2	0	0	4.30265	0		1.66667	0.57735	0.333333	4.30265	1.43422		2.33333	0.57735	0.333333	4.30265	1.43422
		Huth et al.	2023		2.33333	1.1547	0.666667	4.30265	2.86844		1.66667	0.57735	0.333333	4.30265	1.43422		2.33333	1.52753	0.881917	4.30265	3.79458		3.33333	1.1547	0.666667	4.30265	2.86844
